# Supplementary material for: Endothelial Protease Activated Receptor 1 (PAR1) Signalling Is Required for Lymphocyte Transmigration across Brain Microvascular Endothelial Cells
Source: MDPI journal article supplement (doi:10.3390/cells9122723), 2020-12-21
Supplement: s1 [file s1]

**A****PAR1**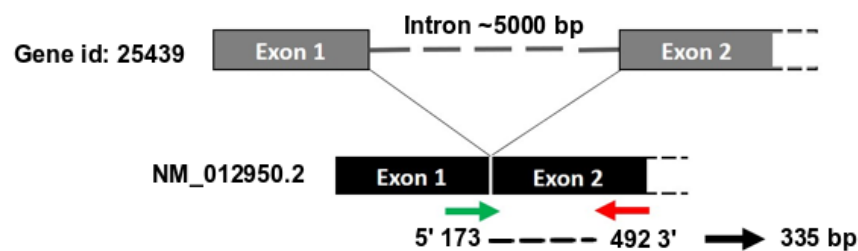**PAR2**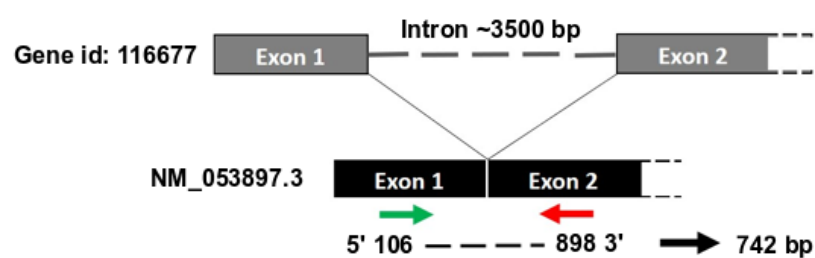**PAR3**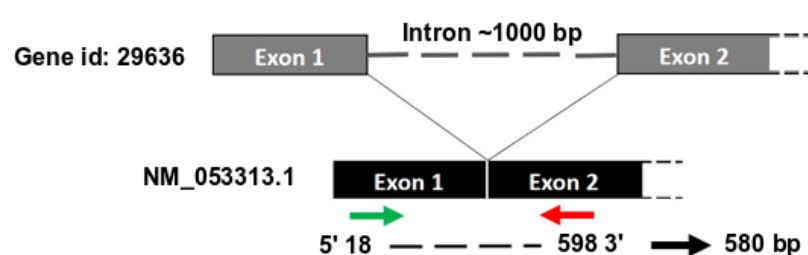**PAR4**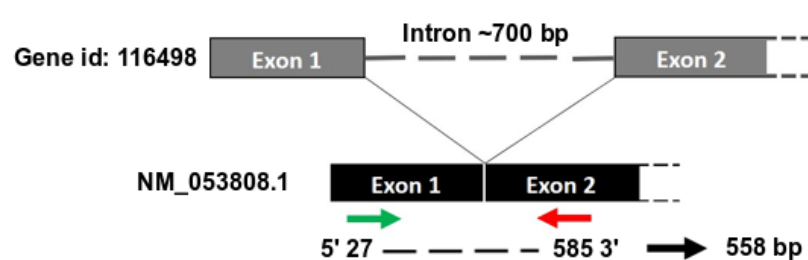**B**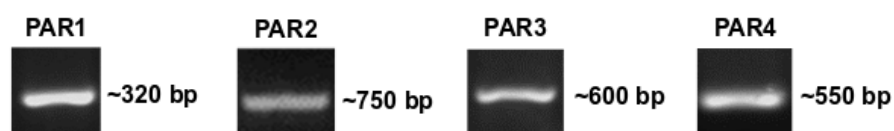

**Figure S1: All four PARs are expressed in GPNT cells.**

**(A)** Schematic illustrating the predicted annealing position of the specific primers within each PAR gene (using NCBI reference genes as indicated). Note that each primer pair spans an intron. The small and much larger predicted amplification product sizes from cDNA and genomic DNA, respectively, are also noted. **(B)** RT-PCR products for PAR1-4 using the primer pairs described in panel (A). Observed sizes (in relation to a 50 bp maker) are noted on the right. Note that detected sizes corresponded to that of predicted cDNA but not genomic DNA products. The identity of all PCR products was further verified by the presence of unique restriction enzyme sites as well as DNA sequencing.
